# Supplementary material for: Susceptibility to Declarative Memory Interference is Pronounced in Primary Insomnia
Source: PLoS One. 2013 Feb 25;8(2):e57394. doi: 10.1371/journal.pone.0057394 (PMC3581453; doi:10.1371/journal.pone.0057394)
Supplement: Table S2 — Correlation coefficients between spindle parameters and memory change scores. (XLSX) [file pone.0057394.s004.xlsx]

## Sheet: Tabelle1
Supplementary Table 2. Correlation coefficients between spindle parameters and memory change scores
		N2 slow SpA	N3 slow SpA	N2 fast SpA	N3 fast SpA	N2 slow SpA	N3 slow SpA	N2 fast SpA	N3 fast SpA	N2 slow SpA	N3 slow SpA	N2 fast SpA	N3 fast SpA	N2 slow SpA	N3 slow SpA	N2 fast SpA	N3 fast SpA	N2 slow SpA	N3 slow SpA	N2 fast SpA	N3 fast SpA	N2 slow SpA	N3 slow SpA	N2 fast SpA	N3 fast SpA
FTT		F3				F4				C3				C4				P3				P4
controls	OMC 1	0.271	0.295	0.278	0.249	0.288	0.187	0.297	0.226	0.161	0.335	0.291	0.303	0.320	0.148	0.317	0.293	-0.048	0.140	0.305	0.337	-0.039	0.207	0.294	0.374
	OMC 2	0.164	0.317	0.072	0.155	0.248	0.365	0.128	0.243	0.166	0.545*	0.165	0.206	0.221	0.508*	0.217	0.459*	0.061	0.132	0.061	0.255	0.020	0.229	0.116	0.318
patients	OMC 1	0.194	0.134	0.201	0.187	0.262	0.218	0.157	0.283	0.167	0.137	0.149	0.133	0.090	0.064	0.077	0.128	0.094	0.202	0.154	0.185	0.189	0.272	0.084	0.216
	OMC 2	-0.002	-0.041	0.080	0.041	-0.032	-0.015	0.079	-0.067	0.096	-0.160	0.149	0.004	-0.027	-0.101	0.143	0.119	0.103	0.157	0.223	0.096	0.173	0.179	0.212	0.075
WORDS		F3				F4				C3				C4				P3				P4
controls	OMC 1	-0.300	-0.236	-0.102	-0.086	-0.318	-0.365	-0.144	-0.207	-0.309	0.028	-0.041	-0.022	-0.415	-0.039	-0.182	-0.299	-0.237	0.288	-0.003	-0.048	-0.321	-0.012	-0.139	-0.138
	OMC 2	0.162	0.062	0.315	0.292	0.163	-0.039	0.287	0.254	0.197	-0.071	0.390	0.315	-0.011	-0.116	0.225	0.156	0.070	0.161	0.338	0.286	-0.048	-0.071	0.241	0.137
patients	OMC 1	-0.162	-0.192	0.059	-0.052	-0.114	-0.129	0.077	-0.005	-0.250	-0.097	0.007	-0.043	-0.238	-0.172	0.026	0.074	-0.218	0.109	0.077	0.009	-0.133	0.227	0.068	0.076
	OMC 2	0.317	0.340	0.431*	0.417*	0.323	0.347	0.410*	0.398*	0.186	0.280	0.395	0.355	0.199	0.204	0.370	0.413*	-0.063	0.148	0.375	0.375	0.043	0.467*	0.337	0.329
Values refer to pearson correlation coefficients. OMC1 = overnight memory change 1 (MEM-CONSOLIDATION – MEM-ENCODING); OMC2= overnight memory change 2 (MEM-SUSCEPTIBILITY – MEM-ENCODING); N2 = stage 2 sleep; N3 = slow-wave sleep; SpA = spindle activity. (*)p < 0.1, *p < 0.05, **p < 0.01.
